# Supplementary material for: Computational study of H2 generation from BH3 and BH3− with HO˙ radical
Source: Royal Society of Chemistry journal article supplement (doi:10.1039/d6ra03503e), 2026-05-28
Supplement: d6ra03503e1.pdf [file d6ra03503e1.pdf]

## Electronic Supporting Information (ESI)

# Computational Study of H<sub>2</sub> Generation from BH<sub>3</sub> and BH<sub>3</sub><sup>-</sup> with HO· radical

Trinh Le Huyen<sup>1,2</sup>, Pham Cam Nam<sup>1,2\*</sup>

<sup>1</sup> Faculty of Chemical Engineering, University of Science and Technology, The University of Danang, Danang 550000, Viet Nam

<sup>2</sup>Strategic Materials & Advanced Research Team – DUT (SMART-DUT), The University of Danang- University of Science and Technology, Danang 550000, Viet Nam

**Table S1.** Cartesian coordinates of all species related to all reactions were calculated at the M06-2X/6-311++G(d,p) level of theory.

|                                                          |              |              |              |                                                          |              |              |              |
|----------------------------------------------------------|--------------|--------------|--------------|----------------------------------------------------------|--------------|--------------|--------------|
| <b>BH<sub>3</sub><sup>-</sup> - G</b>                    |              |              |              | <b>BH<sub>3</sub> - G</b>                                |              |              |              |
| 5                                                        | 0.000000000  | 0.000000000  | 0.000000000  | 5                                                        | 0.000000000  | 0.000000000  | 0.000000000  |
| 1                                                        | 0.000000000  | 1.204785000  | 0.000000000  | 1                                                        | 0.000000000  | 1.187546000  | 0.000000000  |
| 1                                                        | -1.043374000 | -0.602392000 | 0.000000000  | 1                                                        | 1.028445000  | -0.593773000 | 0.000000000  |
| 1                                                        | 1.043374000  | -0.602392000 | 0.000000000  | 1                                                        | -1.028445000 | -0.593773000 | 0.000000000  |
| Zero-point correction= 0.023846 (Hartree/Particle)       |              |              |              | Zero-point correction= 0.026751 (Hartree/Particle)       |              |              |              |
| Thermal correction to Energy= 0.026894                   |              |              |              | Thermal correction to Energy= 0.029634                   |              |              |              |
| Thermal correction to Enthalpy= 0.027839                 |              |              |              | Thermal correction to Enthalpy= 0.030578                 |              |              |              |
| Thermal correction to Gibbs Free Energy= 0.005552        |              |              |              | Thermal correction to Gibbs Free Energy= 0.009211        |              |              |              |
| Sum of electronic and zero-point Energies= -26.564603    |              |              |              | Sum of electronic and zero-point Energies= -26.565431    |              |              |              |
| Sum of electronic and thermal Energies= -26.561555       |              |              |              | Sum of electronic and thermal Energies= -26.562549       |              |              |              |
| Sum of electronic and thermal Enthalpies= -26.560611     |              |              |              | Sum of electronic and thermal Enthalpies= -26.561604     |              |              |              |
| Sum of electronic and thermal Free Energies= -26.582897  |              |              |              | Sum of electronic and thermal Free Energies= -26.582971  |              |              |              |
| <b>BH<sub>3</sub><sup>-</sup> - W</b>                    |              |              |              | <b>BH<sub>3</sub> - W</b>                                |              |              |              |
| 5                                                        | 0.000000000  | 0.000000000  | 0.000000000  | 5                                                        | 0.000000000  | 0.000000000  | 0.000000000  |
| 1                                                        | 0.000000000  | 1.204785000  | 0.000000000  | 1                                                        | 0.000000000  | 1.187546000  | 0.000000000  |
| 1                                                        | -1.043374000 | -0.602392000 | 0.000000000  | 1                                                        | -1.028445000 | -0.593773000 | 0.000000000  |
| 1                                                        | 1.043374000  | -0.602392000 | 0.000000000  | 1                                                        | 1.028445000  | -0.593773000 | 0.000000000  |
| Zero-point correction= 0.023105 (Hartree/Particle)       |              |              |              | Zero-point correction= 0.026640 (Hartree/Particle)       |              |              |              |
| Thermal correction to Energy= 0.026372                   |              |              |              | Thermal correction to Energy= 0.029524                   |              |              |              |
| Thermal correction to Enthalpy= 0.027317                 |              |              |              | Thermal correction to Enthalpy= 0.030469                 |              |              |              |
| Thermal correction to Gibbs Free Energy= 0.004651        |              |              |              | Thermal correction to Gibbs Free Energy= 0.009100        |              |              |              |
| Sum of electronic and zero-point Energies= -26.662083    |              |              |              | Sum of electronic and zero-point Energies= -26.566296    |              |              |              |
| Sum of electronic and thermal Energies= -26.658815       |              |              |              | Sum of electronic and thermal Energies= -26.563411       |              |              |              |
| Sum of electronic and thermal Enthalpies= -26.657871     |              |              |              | Sum of electronic and thermal Enthalpies= -26.562467     |              |              |              |
| Sum of electronic and thermal Free Energies= -26.680537  |              |              |              | Sum of electronic and thermal Free Energies= -26.583836  |              |              |              |
| <b>LM1-G</b>                                             |              |              |              | <b>TS1-G</b>                                             |              |              |              |
| 5                                                        | 0.642010000  | 0.147213000  | 0.000218000  | 5                                                        | -0.562121000 | 0.290320000  | -0.201397000 |
| 1                                                        | 1.317650000  | -0.708970000 | 0.672996000  | 1                                                        | -1.081092000 | 1.205547000  | 0.349804000  |
| 1                                                        | 1.317634000  | -0.710367000 | -0.672619000 | 1                                                        | -1.524610000 | -0.875475000 | -0.183907000 |
| 1                                                        | 1.067392000  | 1.257058000  | -0.001081000 | 1                                                        | -1.526662000 | -0.858692000 | 0.621387000  |
| 8                                                        | -0.706734000 | -0.150888000 | -0.000123000 | 8                                                        | 0.716523000  | -0.149495000 | -0.054216000 |
| 1                                                        | -1.258854000 | 0.633322000  | 0.000596000  | 1                                                        | 1.210784000  | 0.272984000  | 0.653429000  |
| Zero-point correction= 0.040523 (Hartree/Particle)       |              |              |              | Zero-point correction= 0.038476 (Hartree/Particle)       |              |              |              |
| Thermal correction to Energy= 0.043984                   |              |              |              | Thermal correction to Energy= 0.042123                   |              |              |              |
| Thermal correction to Enthalpy= 0.044928                 |              |              |              | Thermal correction to Enthalpy= 0.043067                 |              |              |              |
| Thermal correction to Gibbs Free Energy= 0.017139        |              |              |              | Thermal correction to Gibbs Free Energy= 0.014872        |              |              |              |
| Sum of electronic and zero-point Energies= -102.361275   |              |              |              | Sum of electronic and zero-point Energies= -102.341914   |              |              |              |
| Sum of electronic and thermal Energies= -102.357813      |              |              |              | Sum of electronic and thermal Energies= -102.338268      |              |              |              |
| Sum of electronic and thermal Enthalpies= -102.356869    |              |              |              | Sum of electronic and thermal Enthalpies= -102.337324    |              |              |              |
| Sum of electronic and thermal Free Energies= -102.384658 |              |              |              | Sum of electronic and thermal Free Energies= -102.365519 |              |              |              |

|                                                          |              |              |              |                                                          |              |              |              |
|----------------------------------------------------------|--------------|--------------|--------------|----------------------------------------------------------|--------------|--------------|--------------|
| <b>TS2-G</b>                                             |              |              |              | <b>BH<sub>2</sub>O<sup>-</sup>-G</b>                     |              |              |              |
| 5                                                        | 0.664847000  | -0.097686000 | -0.005165000 | 5                                                        | 0.607726000  | -0.000014000 | 0.000000000  |
| 1                                                        | 0.996558000  | -0.288533000 | 1.150375000  | 1                                                        | 1.194161000  | 1.049613000  | 0.000001000  |
| 1                                                        | 1.263725000  | -0.711740000 | -0.834839000 | 1                                                        | 1.194649000  | -1.049291000 | 0.000001000  |
| 1                                                        | 0.871334000  | 1.225578000  | -0.147579000 | 8                                                        | -0.678430000 | -0.000031000 | 0.000000000  |
| 8                                                        | -0.789724000 | -0.092101000 | -0.006662000 |                                                          |              |              |              |
| 1                                                        | -0.138057000 | 0.999933000  | -0.088836000 |                                                          |              |              |              |
| Zero-point correction= 0.036188 (Hartree/Particle)       |              |              |              | Zero-point correction= 0.020448 (Hartree/Particle)       |              |              |              |
| Thermal correction to Energy= 0.039517                   |              |              |              | Thermal correction to Energy= 0.023549                   |              |              |              |
| Thermal correction to Enthalpy= 0.040462                 |              |              |              | Thermal correction to Enthalpy= 0.024493                 |              |              |              |
| Thermal correction to Gibbs Free Energy= 0.012772        |              |              |              | Thermal correction to Gibbs Free Energy= -0.002090       |              |              |              |
| Sum of electronic and zero-point Energies= -102.284690   |              |              |              | Sum of electronic and zero-point Energies= -101.205069   |              |              |              |
| Sum of electronic and thermal Energies= -102.281360      |              |              |              | Sum of electronic and thermal Energies= -101.201968      |              |              |              |
| Sum of electronic and thermal Enthalpies= -102.280416    |              |              |              | Sum of electronic and thermal Enthalpies= -101.201024    |              |              |              |
| Sum of electronic and thermal Free Energies= -102.308105 |              |              |              | Sum of electronic and thermal Free Energies= -101.227608 |              |              |              |
| <b>OHBH<sup>-</sup>-G</b>                                |              |              |              | <b>LM1-W</b>                                             |              |              |              |
| 5                                                        | -0.769398000 | -0.188149000 | 0.000000000  | 5                                                        | 0.642303000  | 0.147847000  | -0.000010000 |
| 1                                                        | -1.527323000 | 0.738332000  | 0.000000000  | 1                                                        | 1.327407000  | -0.706873000 | 0.665009000  |
| 8                                                        | 0.557729000  | -0.077225000 | 0.000000000  | 1                                                        | 1.327405000  | -0.706909000 | -0.664955000 |
| 1                                                        | 0.912484000  | 0.820213000  | 0.000000000  | 1                                                        | 1.062088000  | 1.259601000  | -0.000011000 |
|                                                          |              |              |              | 8                                                        | -0.708439000 | -0.152420000 | -0.000005000 |
|                                                          |              |              |              | 1                                                        | -1.260904000 | 0.634303000  | 0.000048000  |
| Zero-point correction= 0.024051 (Hartree/Particle)       |              |              |              | Zero-point correction= 0.040364 (Hartree/Particle)       |              |              |              |
| Thermal correction to Energy= 0.027066                   |              |              |              | Thermal correction to Energy= 0.043838                   |              |              |              |
| Thermal correction to Enthalpy= 0.028010                 |              |              |              | Thermal correction to Enthalpy= 0.044782                 |              |              |              |
| Thermal correction to Gibbs Free Energy= 0.001696        |              |              |              | Thermal correction to Gibbs Free Energy= 0.016971        |              |              |              |
| Sum of electronic and zero-point Energies= -101.199512   |              |              |              | Sum of electronic and zero-point Energies= -102.365846   |              |              |              |
| Sum of electronic and thermal Energies= -101.196498      |              |              |              | Sum of electronic and thermal Energies= -102.362373      |              |              |              |
| Sum of electronic and thermal Enthalpies= -101.195554    |              |              |              | Sum of electronic and thermal Enthalpies= -102.361429    |              |              |              |
| Sum of electronic and thermal Free Energies= -101.221868 |              |              |              | Sum of electronic and thermal Free Energies= -102.389239 |              |              |              |
| <b>TS1-W</b>                                             |              |              |              | <b>TS2-W</b>                                             |              |              |              |
| 5                                                        | -0.565004000 | 0.291539000  | -0.205744000 | 5                                                        | 0.661033000  | -0.095968000 | -0.008096000 |
| 1                                                        | -1.086972000 | 1.191439000  | 0.366743000  | 1                                                        | 0.962180000  | -0.220990000 | 1.173286000  |
| 1                                                        | -1.532463000 | -0.902220000 | -0.174668000 | 1                                                        | 1.280301000  | -0.765885000 | -0.777637000 |
| 1                                                        | -1.507581000 | -0.847154000 | 0.618053000  | 1                                                        | 0.880235000  | 1.208199000  | -0.183639000 |
| 8                                                        | 0.720827000  | -0.141384000 | -0.059832000 | 8                                                        | -0.786421000 | -0.092740000 | -0.006094000 |
| 1                                                        | 1.185417000  | 0.231311000  | 0.697250000  | 1                                                        | -0.136516000 | 1.000437000  | -0.122775000 |
| Zero-point correction= 0.038937 (Hartree/Particle)       |              |              |              | Zero-point correction= 0.035957 (Hartree/Particle)       |              |              |              |
| Thermal correction to Energy= 0.042535                   |              |              |              | Thermal correction to Energy= 0.039260                   |              |              |              |
| Thermal correction to Enthalpy= 0.043480                 |              |              |              | Thermal correction to Enthalpy= 0.040204                 |              |              |              |
| Thermal correction to Gibbs Free Energy= 0.015355        |              |              |              | Thermal correction to Gibbs Free Energy= 0.012572        |              |              |              |
| Sum of electronic and zero-point Energies= -102.347216   |              |              |              | Sum of electronic and zero-point Energies= -102.288182   |              |              |              |
| Sum of electronic and thermal Energies= -102.343617      |              |              |              | Sum of electronic and thermal Energies= -102.284879      |              |              |              |
| Sum of electronic and thermal Enthalpies= -102.342673    |              |              |              | Sum of electronic and thermal Enthalpies= -102.283935    |              |              |              |
| Sum of electronic and thermal Free Energies= -102.370798 |              |              |              | Sum of electronic and thermal Free Energies= -102.311568 |              |              |              |
| <b>BH<sub>2</sub>O<sup>-</sup>-W</b>                     |              |              |              | <b>OHBH<sup>-</sup>-W</b>                                |              |              |              |
| 5                                                        | 0.605636000  | -0.000001000 | 0.000000000  | 5                                                        | 0.122801000  | 0.780371000  | 0.000000000  |
| 1                                                        | 1.200083000  | 1.047041000  | 0.000001000  | 1                                                        | -0.851550000 | 1.471318000  | 0.000000000  |
| 1                                                        | 1.200124000  | -1.047014000 | 0.000001000  | 8                                                        | 0.122801000  | -0.549476000 | 0.000000000  |
| 8                                                        | -0.678549000 | -0.000003000 | 0.000000000  | 1                                                        | -0.744868000 | -0.977364000 | 0.000000000  |
| Zero-point correction= 0.020102 (Hartree/Particle)       |              |              |              | Zero-point correction= 0.023856 (Hartree/Particle)       |              |              |              |
| Thermal correction to Energy= 0.023234                   |              |              |              | Thermal correction to Energy= 0.026878                   |              |              |              |
| Thermal correction to Enthalpy= 0.024178                 |              |              |              | Thermal correction to Enthalpy= 0.027822                 |              |              |              |
| Thermal correction to Gibbs Free Energy= -0.002448       |              |              |              | Thermal correction to Gibbs Free Energy= 0.001504        |              |              |              |
| Sum of electronic and zero-point Energies= -101.207867   |              |              |              | Sum of electronic and zero-point Energies= -101.205156   |              |              |              |
| Sum of electronic and thermal Energies= -101.204735      |              |              |              | Sum of electronic and thermal Energies= -101.202134      |              |              |              |
| Sum of electronic and thermal Enthalpies= -101.203791    |              |              |              | Sum of electronic and thermal Enthalpies= -101.201190    |              |              |              |
| Sum of electronic and thermal Free Energies= -101.230416 |              |              |              | Sum of electronic and thermal Free Energies= -101.227508 |              |              |              |
| <b>LM2-G</b>                                             |              |              |              | <b>TS3-G</b>                                             |              |              |              |
| 5                                                        | -0.741554000 | 0.013263000  | -0.000023000 | 5                                                        | 0.713688000  | -0.083453000 | -0.018109000 |
| 1                                                        | -1.234578000 | -1.115715000 | 0.000008000  | 1                                                        | 1.365775000  | -0.815349000 | 0.685122000  |
| 1                                                        | -1.143698000 | 0.630751000  | 1.007503000  | 1                                                        | 1.272577000  | 0.555334000  | -0.856684000 |
| 1                                                        | -1.143761000 | 0.630698000  | -1.007409000 | 1                                                        | -0.038146000 | 2.240566000  | 0.512089000  |
| 8                                                        | 0.763105000  | -0.121954000 | 0.000016000  | 8                                                        | -0.645361000 | -0.271281000 | -0.004435000 |
| 1                                                        | 1.124966000  | 0.763581000  | -0.000114000 | 1                                                        | -1.005753000 | 0.606963000  | -0.214497000 |
| Zero-point correction= 0.041549 (Hartree/Particle)       |              |              |              | Zero-point correction= 0.036926 (Hartree/Particle)       |              |              |              |
| Thermal correction to Energy= 0.045064                   |              |              |              | Thermal correction to Energy= 0.040451                   |              |              |              |

|                                                                                                                                                                                                                                                                                                                                                                                                                                                                                                                                                                                                                                                                                                                     |                                                                                                                                                                                                                                                                                                                                                                                                                                                                                                                                                                                                                                                                                                                      |
|---------------------------------------------------------------------------------------------------------------------------------------------------------------------------------------------------------------------------------------------------------------------------------------------------------------------------------------------------------------------------------------------------------------------------------------------------------------------------------------------------------------------------------------------------------------------------------------------------------------------------------------------------------------------------------------------------------------------|----------------------------------------------------------------------------------------------------------------------------------------------------------------------------------------------------------------------------------------------------------------------------------------------------------------------------------------------------------------------------------------------------------------------------------------------------------------------------------------------------------------------------------------------------------------------------------------------------------------------------------------------------------------------------------------------------------------------|
| Thermal correction to Enthalpy= 0.046009<br>Thermal correction to Gibbs Free Energy= 0.018563<br>Sum of electronic and zero-point Energies= -102.457462<br>Sum of electronic and thermal Energies= -102.453947<br>Sum of electronic and thermal Enthalpies= -102.453002<br>Sum of electronic and thermal Free Energies= -102.480448                                                                                                                                                                                                                                                                                                                                                                                 | Thermal correction to Enthalpy= 0.041395<br>Thermal correction to Gibbs Free Energy= 0.013829<br>Sum of electronic and zero-point Energies= -102.397887<br>Sum of electronic and thermal Energies= -102.394362<br>Sum of electronic and thermal Enthalpies= -102.393418<br>Sum of electronic and thermal Free Energies= -102.420984                                                                                                                                                                                                                                                                                                                                                                                  |
| <b>TS4-G</b><br>5 -0.532344000 0.384780000 -0.259485000<br>1 -0.871703000 1.127351000 0.673923000<br>1 -1.671363000 -0.666127000 -0.233836000<br>1 -1.900890000 -1.005622000 0.536634000<br>8 0.749996000 -0.178269000 -0.060244000<br>1 1.105708000 0.046651000 0.802656000<br>Zero-point correction= 0.035259 (Hartree/Particle)<br>Thermal correction to Energy= 0.038926<br>Thermal correction to Enthalpy= 0.039870<br>Thermal correction to Gibbs Free Energy= 0.012083<br>Sum of electronic and zero-point Energies= -102.344725<br>Sum of electronic and thermal Energies= -102.341058<br>Sum of electronic and thermal Enthalpies= -102.340114<br>Sum of electronic and thermal Free Energies= -102.367901 | <b>BH<sub>2</sub>O<sup>•-</sup>-G</b><br>5 0.590038000 -0.000018000 -0.000003000<br>1 1.296031000 -1.039881000 0.000004000<br>1 1.295952000 1.039979000 0.000004000<br>8 -0.692771000 -0.000001000 0.000001000<br>Zero-point correction= 0.020446 (Hartree/Particle)<br>Thermal correction to Energy= 0.023375<br>Thermal correction to Enthalpy= 0.024319<br>Thermal correction to Gibbs Free Energy= -0.001400<br>Sum of electronic and zero-point Energies= -101.290599<br>Sum of electronic and thermal Energies= -101.287670<br>Sum of electronic and thermal Enthalpies= -101.286726<br>Sum of electronic and thermal Free Energies= -101.312446                                                               |
| <b>OH-BH<sup>•-</sup>-G</b><br>5 0.829925000 -0.219392000 0.000001000<br>1 1.311326000 0.946697000 -0.000004000<br>8 -0.574221000 -0.085645000 -0.000001000<br>1 -0.867186000 0.835423000 0.000005000<br>Zero-point correction= 0.021680 (Hartree/Particle)<br>Thermal correction to Energy= 0.024722<br>Thermal correction to Enthalpy= 0.025666<br>Thermal correction to Gibbs Free Energy= -0.000212<br>Sum of electronic and zero-point Energies= -101.192042<br>Sum of electronic and thermal Energies= -101.189000<br>Sum of electronic and thermal Enthalpies= -101.188056<br>Sum of electronic and thermal Free Energies= -101.213934                                                                       | <b>LM2-W</b><br>5 0.738969000 -0.017429000 0.000029000<br>1 1.226001000 1.112792000 0.000063000<br>1 1.146391000 -0.623690000 1.002218000<br>1 1.146472000 -0.623667000 -1.002150000<br>8 -0.757385000 0.121498000 -0.000029000<br>1 -1.154629000 -0.750272000 -0.000041000<br>Zero-point correction= 0.042073 (Hartree/Particle)<br>Thermal correction to Energy= 0.045526<br>Thermal correction to Enthalpy= 0.046470<br>Thermal correction to Gibbs Free Energy= 0.019158<br>Sum of electronic and zero-point Energies= -102.559273<br>Sum of electronic and thermal Energies= -102.555820<br>Sum of electronic and thermal Enthalpies= -102.554876<br>Sum of electronic and thermal Free Energies= -102.582188   |
| <b>TS3-W</b><br>5 -0.321288000 0.678209000 0.042289000<br>1 -0.986861000 1.220349000 -0.783455000<br>1 0.188591000 1.270738000 0.942071000<br>1 3.423986000 0.446774000 -0.357311000<br>8 -0.175503000 -0.660297000 -0.077073000<br>1 0.384748000 -1.046534000 0.603832000<br>Zero-point correction= 0.036643 (Hartree/Particle)<br>Thermal correction to Energy= 0.040833<br>Thermal correction to Enthalpy= 0.041777<br>Thermal correction to Gibbs Free Energy= 0.012298<br>Sum of electronic and zero-point Energies= -102.510926<br>Sum of electronic and thermal Energies= -102.506736<br>Sum of electronic and thermal Enthalpies= -102.505792<br>Sum of electronic and thermal Free Energies= -102.535271   | <b>LM3-W</b><br>5 -0.776498000 0.220636000 0.000012000<br>1 -1.800351000 -0.406437000 0.001380000<br>1 -0.810929000 1.423972000 -0.000931000<br>1 2.183178000 1.058229000 0.001547000<br>8 0.386539000 -0.427142000 -0.000136000<br>1 1.218281000 0.238189000 -0.000968000<br>Zero-point correction= 0.036638 (Hartree/Particle)<br>Thermal correction to Energy= 0.040276<br>Thermal correction to Enthalpy= 0.041220<br>Thermal correction to Gibbs Free Energy= 0.013548<br>Sum of electronic and zero-point Energies= -102.526925<br>Sum of electronic and thermal Energies= -102.523287<br>Sum of electronic and thermal Enthalpies= -102.522343<br>Sum of electronic and thermal Free Energies= -102.550015    |
| <b>TS3a-W</b><br>5 0.768414000 0.212413000 -0.000321000<br>1 0.802054000 1.423720000 0.001189000<br>1 1.814554000 -0.390341000 -0.000419000<br>1 -2.086462000 1.041391000 -0.000356000<br>8 -0.385780000 -0.431959000 0.000254000<br>1 -1.285972000 0.318838000 -0.000840000<br>Zero-point correction= 0.033614 (Hartree/Particle)<br>Thermal correction to Energy= 0.037190<br>Thermal correction to Enthalpy= 0.038135<br>Thermal correction to Gibbs Free Energy= 0.010546<br>Sum of electronic and zero-point Energies= -102.529382<br>Sum of electronic and thermal Energies= -102.525806<br>Sum of electronic and thermal Enthalpies= -102.524862<br>Sum of electronic and thermal Free Energies= -102.552450 | <b>TS4-W</b><br>5 -0.580772000 0.362594000 -0.246423000<br>1 -1.006788000 0.985481000 0.719769000<br>1 -1.569293000 -0.812637000 -0.270842000<br>1 -1.569007000 -0.977028000 0.545464000<br>8 0.748073000 -0.122744000 -0.073844000<br>1 1.064370000 -0.026837000 0.828475000<br>Zero-point correction= 0.037135 (Hartree/Particle)<br>Thermal correction to Energy= 0.040662<br>Thermal correction to Enthalpy= 0.041606<br>Thermal correction to Gibbs Free Energy= 0.014131<br>Sum of electronic and zero-point Energies= -102.443663<br>Sum of electronic and thermal Energies= -102.440136<br>Sum of electronic and thermal Enthalpies= -102.439192<br>Sum of electronic and thermal Free Energies= -102.466667 |
| <b>OHBH<sup>•-</sup>-W</b>                                                                                                                                                                                                                                                                                                                                                                                                                                                                                                                                                                                                                                                                                          | <b>BH<sub>2</sub>O<sup>•-</sup>-W</b>                                                                                                                                                                                                                                                                                                                                                                                                                                                                                                                                                                                                                                                                                |

|                                                          |              |              |              |                                                          |              |              |              |
|----------------------------------------------------------|--------------|--------------|--------------|----------------------------------------------------------|--------------|--------------|--------------|
| 5                                                        | 0.822142000  | -0.213828000 | -0.000002000 | 5                                                        | 0.599128000  | 0.000002000  | 0.000001000  |
| 1                                                        | 1.326341000  | 0.917654000  | -0.000003000 | 1                                                        | 1.280069000  | -1.034377000 | 0.000002000  |
| 8                                                        | -0.570465000 | -0.084956000 | 0.000001000  | 1                                                        | 1.280065000  | 1.034374000  | 0.000002000  |
| 1                                                        | -0.873333000 | 0.831128000  | 0.000002000  | 8                                                        | -0.694472000 | -0.000001000 | -0.000001000 |
| Zero-point correction= 0.022840 (Hartree/Particle)       |              |              |              | Zero-point correction= 0.020905 (Hartree/Particle)       |              |              |              |
| Thermal correction to Energy= 0.025844                   |              |              |              | Thermal correction to Energy= 0.023833                   |              |              |              |
| Thermal correction to Enthalpy= 0.026789                 |              |              |              | Thermal correction to Enthalpy= 0.024777                 |              |              |              |
| Thermal correction to Gibbs Free Energy= 0.000991        |              |              |              | Thermal correction to Gibbs Free Energy= -0.000940       |              |              |              |
| Sum of electronic and zero-point Energies= -101.301032   |              |              |              | Sum of electronic and zero-point Energies= -101.394971   |              |              |              |
| Sum of electronic and thermal Energies= -101.298028      |              |              |              | Sum of electronic and thermal Energies= -101.392043      |              |              |              |
| Sum of electronic and thermal Enthalpies= -101.297084    |              |              |              | Sum of electronic and thermal Enthalpies= -101.391099    |              |              |              |
| Sum of electronic and thermal Free Energies= -101.322881 |              |              |              | Sum of electronic and thermal Free Energies= -101.416816 |              |              |              |

**Table S2.** Calculated equilibrium constants ( $K_c$ ) for pre-reactive complex formation and unimolecular rate constants ( $k_2$ ) for the subsequent product-forming step obtained at the M06-2X/6-311++G(d,p) level under the high-pressure limit approximation, including tunneling corrections using the Eckart and Wigner methods.

| <b>(BH<sub>3</sub> + HO<sup>•</sup>)-G → LM1-G → TS1-G → (OHBH<sup>•</sup> + H<sub>2</sub>)-G</b>             |                                                             |                                       |                        |                                                                              |                        |                                                                              |
|---------------------------------------------------------------------------------------------------------------|-------------------------------------------------------------|---------------------------------------|------------------------|------------------------------------------------------------------------------|------------------------|------------------------------------------------------------------------------|
| <i>T(K)</i>                                                                                                   | <i>K<sub>c</sub> (cm<sup>3</sup> molecule<sup>-1</sup>)</i> | <i>k<sub>2</sub> (s<sup>-1</sup>)</i> | <i>κ<sub>Eck</sub></i> | <i>k<sub>Eck</sub> (cm<sup>3</sup> molecule<sup>-1</sup> s<sup>-1</sup>)</i> | <i>κ<sub>Wig</sub></i> | <i>k<sub>Wig</sub> (cm<sup>3</sup> molecule<sup>-1</sup> s<sup>-1</sup>)</i> |
| 280                                                                                                           | 8.30E+12                                                    | 2.40E+03                              | 1.7                    | 3.30E+16                                                                     | 1.5                    | 2.90E+16                                                                     |
| 290                                                                                                           | 3.70E+11                                                    | 5.30E+03                              | 1.6                    | 3.20E+15                                                                     | 1.4                    | 2.90E+15                                                                     |
| 298.15                                                                                                        | 3.50E+10                                                    | 9.80E+03                              | 1.6                    | 5.40E+14                                                                     | 1.4                    | 4.80E+14                                                                     |
| 300                                                                                                           | 2.10E+10                                                    | 1.10E+04                              | 1.6                    | 3.60E+14                                                                     | 1.4                    | 3.30E+14                                                                     |
| 310                                                                                                           | 1.40E+09                                                    | 2.20E+04                              | 1.5                    | 4.70E+13                                                                     | 1.4                    | 4.30E+13                                                                     |
| 320                                                                                                           | 1.10E+08                                                    | 4.30E+04                              | 1.5                    | 7.00E+12                                                                     | 1.4                    | 6.50E+12                                                                     |
| 330                                                                                                           | 1.00E+07                                                    | 8.00E+04                              | 1.4                    | 1.20E+12                                                                     | 1.3                    | 1.10E+12                                                                     |
| 340                                                                                                           | 1.10E+06                                                    | 1.40E+05                              | 1.4                    | 2.20E+11                                                                     | 1.3                    | 2.00E+11                                                                     |
| 350                                                                                                           | 1.30E+05                                                    | 2.50E+05                              | 1.4                    | 4.50E+10                                                                     | 1.3                    | 4.20E+10                                                                     |
| <b>(BH<sub>3</sub><sup>-</sup> + HO<sup>•</sup>)-G → LM2-G → TS3-G → (OHBH<sup>•</sup> + H<sub>2</sub>)-G</b> |                                                             |                                       |                        |                                                                              |                        |                                                                              |
| <i>T(K)</i>                                                                                                   | <i>K<sub>c</sub> (cm<sup>3</sup> molecule<sup>-1</sup>)</i> | <i>k<sub>2</sub> (s<sup>-1</sup>)</i> | <i>κ<sub>Eck</sub></i> | <i>k<sub>Eck</sub> (cm<sup>3</sup> molecule<sup>-1</sup> s<sup>-1</sup>)</i> | <i>κ<sub>Wig</sub></i> | <i>k<sub>Wig</sub> (cm<sup>3</sup> molecule<sup>-1</sup> s<sup>-1</sup>)</i> |
| 280                                                                                                           | 8.10E+59                                                    | 4.30E-17                              | 1.4                    | 4.9E+43                                                                      | 1.3                    | 4.60E+43                                                                     |
| 290                                                                                                           | 8.40E+56                                                    | 4.60E-16                              | 1.4                    | 5.2E+41                                                                      | 1.3                    | 4.90E+41                                                                     |
| 298.15                                                                                                        | 4.40E+54                                                    | 2.80E-15                              | 1.3                    | 1.6E+40                                                                      | 1.3                    | 1.50E+40                                                                     |
| 300                                                                                                           | 1.40E+54                                                    | 4.10E-15                              | 1.3                    | 7.5E+39                                                                      | 1.3                    | 7.20E+39                                                                     |
| 310                                                                                                           | 3.40E+51                                                    | 3.20E-14                              | 1.3                    | 1.4E+38                                                                      | 1.3                    | 1.40E+38                                                                     |
| 320                                                                                                           | 1.20E+49                                                    | 2.20E-13                              | 1.3                    | 3.4E+36                                                                      | 1.2                    | 3.30E+36                                                                     |
| 330                                                                                                           | 6.20E+46                                                    | 1.40E-12                              | 1.3                    | 1.1E+35                                                                      | 1.2                    | 1.00E+35                                                                     |
| 340                                                                                                           | 4.20E+44                                                    | 7.50E-12                              | 1.3                    | 4.1E+33                                                                      | 1.2                    | 3.80E+33                                                                     |
| 350                                                                                                           | 3.90E+42                                                    | 3.70E-11                              | 1.2                    | 1.7E+32                                                                      | 1.2                    | 1.70E+32                                                                     |

**Table S3.** Calculated kinetic parameters and detailed transition state theory (TST) results for the  $\text{BH}_3$  + atmospheric oxidant reactions in the solution phase at 298.15 K and 1 atm.

```

//*****//
Input parameters
//*****//

Phase          solution
Method         TST/WIG/DIFF/AB
Reaction symmetry 1

Solvent        water
Reaction distance (Angstrom) 1.39
React1 radius (Angstrom) 1.18
React2 radius (Angstrom) 0.5

pKa           9.0
Molar fraction f0
Diffusion constants in M-1 s-1.
(Viscosity in Pa s).
-----
T(K)  visc      kd
-----

280.00 1.43E-03 4.3E+09
290.00 1.08E-03 5.9E+09
298.15 8.90E-04 7.3E+09
300.00 8.54E-04 7.7E+09
310.00 6.94E-04 9.8E+09
320.00 5.77E-04 1.2E+10
330.00 4.90E-04 1.5E+10
340.00 4.22E-04 1.8E+10
350.00 3.69E-04 2.1E+10
-----

Rate constants in (M-1 s-1) of reaction  $\text{BH}_3 + \text{HO}^\bullet \rightarrow \text{LM1} \rightarrow \text{TS1} \rightarrow \text{OHBH}^\bullet + \text{H}_2$  in the Aqueous Solution

```

| pH | T(K)   | kwig    | kapp    | kf      |
|----|--------|---------|---------|---------|
| 1  | 280.00 | 5.9E+36 | 4.3E+09 | 4.3E+01 |
|    | 290.00 | 6.0E+35 | 5.9E+09 | 5.9E+01 |
|    | 298.15 | 1.0E+35 | 7.3E+09 | 7.3E+01 |
|    | 300.00 | 7.1E+34 | 7.7E+09 | 7.7E+01 |
|    | 310.00 | 9.6E+33 | 9.8E+09 | 9.8E+01 |
|    | 320.00 | 1.5E+33 | 1.2E+10 | 1.2E+02 |
|    | 330.00 | 2.6E+32 | 1.5E+10 | 1.5E+02 |
|    | 340.00 | 4.9E+31 | 1.8E+10 | 1.8E+02 |
|    | 350.00 | 1.0E+31 | 2.1E+10 | 2.1E+02 |
| 2  | 280.00 | 5.9E+36 | 4.3E+09 | 4.3E+02 |
|    | 290.00 | 6.0E+35 | 5.9E+09 | 5.9E+02 |
|    | 298.15 | 1.0E+35 | 7.3E+09 | 7.3E+02 |
|    | 300.00 | 7.1E+34 | 7.7E+09 | 7.7E+02 |
|    | 310.00 | 9.6E+33 | 9.8E+09 | 9.8E+02 |
|    | 320.00 | 1.5E+33 | 1.2E+10 | 1.2E+03 |
|    | 330.00 | 2.6E+32 | 1.5E+10 | 1.5E+03 |
|    | 340.00 | 4.9E+31 | 1.8E+10 | 1.8E+03 |
|    | 350.00 | 1.0E+31 | 2.1E+10 | 2.1E+03 |

|   |        |         |         |         |
|---|--------|---------|---------|---------|
|   | 350.00 | 1.0E+31 | 2.1E+10 | 2.1E+03 |
| 3 | 280.00 | 5.9E+36 | 4.3E+09 | 4.3E+03 |
|   | 290.00 | 6.0E+35 | 5.9E+09 | 5.9E+03 |
|   | 298.15 | 1.0E+35 | 7.3E+09 | 7.3E+03 |
|   | 300.00 | 7.1E+34 | 7.7E+09 | 7.7E+03 |
|   | 310.00 | 9.6E+33 | 9.8E+09 | 9.8E+03 |
|   | 320.00 | 1.5E+33 | 1.2E+10 | 1.2E+04 |
|   | 330.00 | 2.6E+32 | 1.5E+10 | 1.5E+04 |
|   | 340.00 | 4.9E+31 | 1.8E+10 | 1.8E+04 |
|   | 350.00 | 1.0E+31 | 2.1E+10 | 2.1E+04 |
| 4 | 280.00 | 5.9E+36 | 4.3E+09 | 4.3E+04 |
|   | 290.00 | 6.0E+35 | 5.9E+09 | 5.9E+04 |
|   | 298.15 | 1.0E+35 | 7.3E+09 | 7.3E+04 |
|   | 300.00 | 7.1E+34 | 7.7E+09 | 7.7E+04 |
|   | 310.00 | 9.6E+33 | 9.8E+09 | 9.8E+04 |
|   | 320.00 | 1.5E+33 | 1.2E+10 | 1.2E+05 |
|   | 330.00 | 2.6E+32 | 1.5E+10 | 1.5E+05 |
|   | 340.00 | 4.9E+31 | 1.8E+10 | 1.8E+05 |
|   | 350.00 | 1.0E+31 | 2.1E+10 | 2.1E+05 |
| 5 | 280.00 | 5.9E+36 | 4.3E+09 | 4.3E+05 |
|   | 290.00 | 6.0E+35 | 5.9E+09 | 5.9E+05 |
|   | 298.15 | 1.0E+35 | 7.3E+09 | 7.3E+05 |
|   | 300.00 | 7.1E+34 | 7.7E+09 | 7.7E+05 |
|   | 310.00 | 9.6E+33 | 9.8E+09 | 9.8E+05 |
|   | 320.00 | 1.5E+33 | 1.2E+10 | 1.2E+06 |
|   | 330.00 | 2.6E+32 | 1.5E+10 | 1.5E+06 |
|   | 340.00 | 4.9E+31 | 1.8E+10 | 1.8E+06 |
|   | 350.00 | 1.0E+31 | 2.1E+10 | 2.1E+06 |
| 6 | 280.00 | 5.9E+36 | 4.3E+09 | 4.3E+06 |
|   | 290.00 | 6.0E+35 | 5.9E+09 | 5.9E+06 |
|   | 298.15 | 1.0E+35 | 7.3E+09 | 7.3E+06 |
|   | 300.00 | 7.1E+34 | 7.7E+09 | 7.7E+06 |
|   | 310.00 | 9.6E+33 | 9.8E+09 | 9.8E+06 |
|   | 320.00 | 1.5E+33 | 1.2E+10 | 1.2E+07 |
|   | 330.00 | 2.6E+32 | 1.5E+10 | 1.5E+07 |
|   | 340.00 | 4.9E+31 | 1.8E+10 | 1.8E+07 |
|   | 350.00 | 1.0E+31 | 2.1E+10 | 2.1E+07 |
| 7 | 280.00 | 5.9E+36 | 4.3E+09 | 4.2E+07 |
|   | 290.00 | 6.0E+35 | 5.9E+09 | 5.8E+07 |
|   | 298.15 | 1.0E+35 | 7.3E+09 | 7.3E+07 |
|   | 300.00 | 7.1E+34 | 7.7E+09 | 7.6E+07 |
|   | 310.00 | 9.6E+33 | 9.8E+09 | 9.7E+07 |
|   | 320.00 | 1.5E+33 | 1.2E+10 | 1.2E+08 |
|   | 330.00 | 2.6E+32 | 1.5E+10 | 1.5E+08 |
|   | 340.00 | 4.9E+31 | 1.8E+10 | 1.8E+08 |
|   | 350.00 | 1.0E+31 | 2.1E+10 | 2.1E+08 |
| 8 | 280.00 | 5.9E+36 | 4.3E+09 | 3.9E+08 |
|   | 290.00 | 6.0E+35 | 5.9E+09 | 5.3E+08 |
|   | 298.15 | 1.0E+35 | 7.3E+09 | 6.7E+08 |
|   | 300.00 | 7.1E+34 | 7.7E+09 | 7.0E+08 |
|   | 310.00 | 9.6E+33 | 9.8E+09 | 8.9E+08 |
|   | 320.00 | 1.5E+33 | 1.2E+10 | 1.1E+09 |
|   | 330.00 | 2.6E+32 | 1.5E+10 | 1.3E+09 |
|   | 340.00 | 4.9E+31 | 1.8E+10 | 1.6E+09 |

|    |        |         |         |         |
|----|--------|---------|---------|---------|
|    | 350.00 | 1.0E+31 | 2.1E+10 | 1.9E+09 |
| 9  | 280.00 | 5.9E+36 | 4.3E+09 | 2.1E+09 |
|    | 290.00 | 6.0E+35 | 5.9E+09 | 2.9E+09 |
|    | 298.15 | 1.0E+35 | 7.3E+09 | 3.7E+09 |
|    | 300.00 | 7.1E+34 | 7.7E+09 | 3.9E+09 |
|    | 310.00 | 9.6E+33 | 9.8E+09 | 4.9E+09 |
|    | 320.00 | 1.5E+33 | 1.2E+10 | 6.1E+09 |
|    | 330.00 | 2.6E+32 | 1.5E+10 | 7.4E+09 |
|    | 340.00 | 4.9E+31 | 1.8E+10 | 8.8E+09 |
|    | 350.00 | 1.0E+31 | 2.1E+10 | 1.0E+10 |
| 10 | 280.00 | 5.9E+36 | 4.3E+09 | 3.9E+09 |
|    | 290.00 | 6.0E+35 | 5.9E+09 | 5.3E+09 |
|    | 298.15 | 1.0E+35 | 7.3E+09 | 6.7E+09 |
|    | 300.00 | 7.1E+34 | 7.7E+09 | 7.0E+09 |
|    | 310.00 | 9.6E+33 | 9.8E+09 | 8.9E+09 |
|    | 320.00 | 1.5E+33 | 1.2E+10 | 1.1E+10 |
|    | 330.00 | 2.6E+32 | 1.5E+10 | 1.3E+10 |
|    | 340.00 | 4.9E+31 | 1.8E+10 | 1.6E+10 |
|    | 350.00 | 1.0E+31 | 2.1E+10 | 1.9E+10 |
| 11 | 280.00 | 5.9E+36 | 4.3E+09 | 4.2E+09 |
|    | 290.00 | 6.0E+35 | 5.9E+09 | 5.8E+09 |
|    | 298.15 | 1.0E+35 | 7.3E+09 | 7.3E+09 |
|    | 300.00 | 7.1E+34 | 7.7E+09 | 7.6E+09 |
|    | 310.00 | 9.6E+33 | 9.8E+09 | 9.7E+09 |
|    | 320.00 | 1.5E+33 | 1.2E+10 | 1.2E+10 |
|    | 330.00 | 2.6E+32 | 1.5E+10 | 1.5E+10 |
|    | 340.00 | 4.9E+31 | 1.8E+10 | 1.8E+10 |
|    | 350.00 | 1.0E+31 | 2.1E+10 | 2.1E+10 |
| 12 | 280.00 | 5.9E+36 | 4.3E+09 | 4.3E+09 |
|    | 290.00 | 6.0E+35 | 5.9E+09 | 5.9E+09 |
|    | 298.15 | 1.0E+35 | 7.3E+09 | 7.3E+09 |
|    | 300.00 | 7.1E+34 | 7.7E+09 | 7.7E+09 |
|    | 310.00 | 9.6E+33 | 9.8E+09 | 9.8E+09 |
|    | 320.00 | 1.5E+33 | 1.2E+10 | 1.2E+10 |
|    | 330.00 | 2.6E+32 | 1.5E+10 | 1.5E+10 |
|    | 340.00 | 4.9E+31 | 1.8E+10 | 1.8E+10 |
|    | 350.00 | 1.0E+31 | 2.1E+10 | 2.1E+10 |
| 13 | 280.00 | 5.9E+36 | 4.3E+09 | 4.3E+09 |
|    | 290.00 | 6.0E+35 | 5.9E+09 | 5.9E+09 |
|    | 298.15 | 1.0E+35 | 7.3E+09 | 7.3E+09 |
|    | 300.00 | 7.1E+34 | 7.7E+09 | 7.7E+09 |
|    | 310.00 | 9.6E+33 | 9.8E+09 | 9.8E+09 |
|    | 320.00 | 1.5E+33 | 1.2E+10 | 1.2E+10 |
|    | 330.00 | 2.6E+32 | 1.5E+10 | 1.5E+10 |
|    | 340.00 | 4.9E+31 | 1.8E+10 | 1.8E+10 |
|    | 350.00 | 1.0E+31 | 2.1E+10 | 2.1E+10 |
| 14 | 280.00 | 5.9E+36 | 4.3E+09 | 4.3E+09 |
|    | 290.00 | 6.0E+35 | 5.9E+09 | 5.9E+09 |
|    | 298.15 | 1.0E+35 | 7.3E+09 | 7.3E+09 |
|    | 300.00 | 7.1E+34 | 7.7E+09 | 7.7E+09 |
|    | 310.00 | 9.6E+33 | 9.8E+09 | 9.8E+09 |
|    | 320.00 | 1.5E+33 | 1.2E+10 | 1.2E+10 |
|    | 330.00 | 2.6E+32 | 1.5E+10 | 1.5E+10 |
|    | 340.00 | 4.9E+31 | 1.8E+10 | 1.8E+10 |

|  |        |         |         |         |
|--|--------|---------|---------|---------|
|  | 350.00 | 1.0E+31 | 2.1E+10 | 2.1E+10 |
|--|--------|---------|---------|---------|

Rate constants in ( $M^{-1} s^{-1}$ ) of reaction  $BH_3^- + HO^{\cdot} \rightarrow TS3 \rightarrow LM3 \rightarrow TS3a$

$\rightarrow OHBH^{\cdot} + H_2$  in the aqueous solution

| pH       | T(K)   | kwig    | kapp    | kf      |
|----------|--------|---------|---------|---------|
| <b>1</b> | 280.00 | 6.7E+69 | 4.9E+09 | 4.9E+01 |
|          | 290.00 | 4.9E+67 | 6.7E+09 | 6.7E+01 |
|          | 298.15 | 1.2E+66 | 8.4E+09 | 8.4E+01 |
|          | 300.00 | 5.1E+65 | 8.8E+09 | 8.8E+01 |
|          | 310.00 | 7.1E+63 | 1.1E+10 | 1.1E+02 |
|          | 320.00 | 1.3E+62 | 1.4E+10 | 1.4E+02 |
|          | 330.00 | 3.0E+60 | 1.7E+10 | 1.7E+02 |
|          | 340.00 | 8.5E+58 | 2.0E+10 | 2.0E+02 |
|          | 350.00 | 3.0E+57 | 2.4E+10 | 2.4E+02 |
| <b>2</b> | 280.00 | 6.7E+69 | 4.9E+09 | 4.9E+02 |
|          | 290.00 | 4.9E+67 | 6.7E+09 | 6.7E+02 |
|          | 298.15 | 1.2E+66 | 8.4E+09 | 8.4E+02 |
|          | 300.00 | 5.1E+65 | 8.8E+09 | 8.8E+02 |
|          | 310.00 | 7.1E+63 | 1.1E+10 | 1.1E+03 |
|          | 320.00 | 1.3E+62 | 1.4E+10 | 1.4E+03 |
|          | 330.00 | 3.0E+60 | 1.7E+10 | 1.7E+03 |
|          | 340.00 | 8.5E+58 | 2.0E+10 | 2.0E+03 |
|          | 350.00 | 3.0E+57 | 2.4E+10 | 2.4E+03 |
| <b>3</b> | 280.00 | 6.7E+69 | 4.9E+09 | 4.9E+03 |
|          | 290.00 | 4.9E+67 | 6.7E+09 | 6.7E+03 |
|          | 298.15 | 1.2E+66 | 8.4E+09 | 8.4E+03 |
|          | 300.00 | 5.1E+65 | 8.8E+09 | 8.8E+03 |
|          | 310.00 | 7.1E+63 | 1.1E+10 | 1.1E+04 |
|          | 320.00 | 1.3E+62 | 1.4E+10 | 1.4E+04 |
|          | 330.00 | 3.0E+60 | 1.7E+10 | 1.7E+04 |
|          | 340.00 | 8.5E+58 | 2.0E+10 | 2.0E+04 |
|          | 350.00 | 3.0E+57 | 2.4E+10 | 2.4E+04 |
| <b>4</b> | 280.00 | 6.7E+69 | 4.9E+09 | 4.9E+04 |
|          | 290.00 | 4.9E+67 | 6.7E+09 | 6.7E+04 |
|          | 298.15 | 1.2E+66 | 8.4E+09 | 8.4E+04 |
|          | 300.00 | 5.1E+65 | 8.8E+09 | 8.8E+04 |
|          | 310.00 | 7.1E+63 | 1.1E+10 | 1.1E+05 |
|          | 320.00 | 1.3E+62 | 1.4E+10 | 1.4E+05 |
|          | 330.00 | 3.0E+60 | 1.7E+10 | 1.7E+05 |
|          | 340.00 | 8.5E+58 | 2.0E+10 | 2.0E+05 |
|          | 350.00 | 3.0E+57 | 2.4E+10 | 2.4E+05 |
| <b>5</b> | 280.00 | 6.7E+69 | 4.9E+09 | 4.9E+05 |
|          | 290.00 | 4.9E+67 | 6.7E+09 | 6.7E+05 |
|          | 298.15 | 1.2E+66 | 8.4E+09 | 8.4E+05 |
|          | 300.00 | 5.1E+65 | 8.8E+09 | 8.8E+05 |
|          | 310.00 | 7.1E+63 | 1.1E+10 | 1.1E+06 |
|          | 320.00 | 1.3E+62 | 1.4E+10 | 1.4E+06 |
|          | 330.00 | 3.0E+60 | 1.7E+10 | 1.7E+06 |
|          | 340.00 | 8.5E+58 | 2.0E+10 | 2.0E+06 |

|           |        |         |         |         |
|-----------|--------|---------|---------|---------|
|           | 350.00 | 3.0E+57 | 2.4E+10 | 2.4E+06 |
| <b>6</b>  | 280.00 | 6.7E+69 | 4.9E+09 | 4.9E+06 |
|           | 290.00 | 4.9E+67 | 6.7E+09 | 6.7E+06 |
|           | 298.15 | 1.2E+66 | 8.4E+09 | 8.3E+06 |
|           | 300.00 | 5.1E+65 | 8.8E+09 | 8.8E+06 |
|           | 310.00 | 7.1E+63 | 1.1E+10 | 1.1E+07 |
|           | 320.00 | 1.3E+62 | 1.4E+10 | 1.4E+07 |
|           | 330.00 | 3.0E+60 | 1.7E+10 | 1.7E+07 |
|           | 340.00 | 8.5E+58 | 2.0E+10 | 2.0E+07 |
|           | 350.00 | 3.0E+57 | 2.4E+10 | 2.4E+07 |
| <b>7</b>  | 280.00 | 6.7E+69 | 4.9E+09 | 4.8E+07 |
|           | 290.00 | 4.9E+67 | 6.7E+09 | 6.6E+07 |
|           | 298.15 | 1.2E+66 | 8.4E+09 | 8.3E+07 |
|           | 300.00 | 5.1E+65 | 8.8E+09 | 8.7E+07 |
|           | 310.00 | 7.1E+63 | 1.1E+10 | 1.1E+08 |
|           | 320.00 | 1.3E+62 | 1.4E+10 | 1.4E+08 |
|           | 330.00 | 3.0E+60 | 1.7E+10 | 1.7E+08 |
|           | 340.00 | 8.5E+58 | 2.0E+10 | 2.0E+08 |
|           | 350.00 | 3.0E+57 | 2.4E+10 | 2.3E+08 |
| <b>8</b>  | 280.00 | 6.7E+69 | 4.9E+09 | 4.4E+08 |
|           | 290.00 | 4.9E+67 | 6.7E+09 | 6.1E+08 |
|           | 298.15 | 1.2E+66 | 8.4E+09 | 7.6E+08 |
|           | 300.00 | 5.1E+65 | 8.8E+09 | 8.0E+08 |
|           | 310.00 | 7.1E+63 | 1.1E+10 | 1.0E+09 |
|           | 320.00 | 1.3E+62 | 1.4E+10 | 1.3E+09 |
|           | 330.00 | 3.0E+60 | 1.7E+10 | 1.5E+09 |
|           | 340.00 | 8.5E+58 | 2.0E+10 | 1.8E+09 |
|           | 350.00 | 3.0E+57 | 2.4E+10 | 2.2E+09 |
| <b>9</b>  | 280.00 | 6.7E+69 | 4.9E+09 | 2.4E+09 |
|           | 290.00 | 4.9E+67 | 6.7E+09 | 3.3E+09 |
|           | 298.15 | 1.2E+66 | 8.4E+09 | 4.2E+09 |
|           | 300.00 | 5.1E+65 | 8.8E+09 | 4.4E+09 |
|           | 310.00 | 7.1E+63 | 1.1E+10 | 5.6E+09 |
|           | 320.00 | 1.3E+62 | 1.4E+10 | 6.9E+09 |
|           | 330.00 | 3.0E+60 | 1.7E+10 | 8.4E+09 |
|           | 340.00 | 8.5E+58 | 2.0E+10 | 1.0E+10 |
|           | 350.00 | 3.0E+57 | 2.4E+10 | 1.2E+10 |
| <b>10</b> | 280.00 | 6.7E+69 | 4.9E+09 | 4.4E+09 |
|           | 290.00 | 4.9E+67 | 6.7E+09 | 6.1E+09 |
|           | 298.15 | 1.2E+66 | 8.4E+09 | 7.6E+09 |
|           | 300.00 | 5.1E+65 | 8.8E+09 | 8.0E+09 |
|           | 310.00 | 7.1E+63 | 1.1E+10 | 1.0E+10 |
|           | 320.00 | 1.3E+62 | 1.4E+10 | 1.3E+10 |
|           | 330.00 | 3.0E+60 | 1.7E+10 | 1.5E+10 |
|           | 340.00 | 8.5E+58 | 2.0E+10 | 1.8E+10 |
|           | 350.00 | 3.0E+57 | 2.4E+10 | 2.2E+10 |
| <b>11</b> | 280.00 | 6.7E+69 | 4.9E+09 | 4.8E+09 |
|           | 290.00 | 4.9E+67 | 6.7E+09 | 6.6E+09 |
|           | 298.15 | 1.2E+66 | 8.4E+09 | 8.3E+09 |
|           | 300.00 | 5.1E+65 | 8.8E+09 | 8.7E+09 |

|           |        |         |         |         |
|-----------|--------|---------|---------|---------|
|           | 310.00 | 7.1E+63 | 1.1E+10 | 1.1E+10 |
|           | 320.00 | 1.3E+62 | 1.4E+10 | 1.4E+10 |
|           | 330.00 | 3.0E+60 | 1.7E+10 | 1.7E+10 |
|           | 340.00 | 8.5E+58 | 2.0E+10 | 2.0E+10 |
|           | 350.00 | 3.0E+57 | 2.4E+10 | 2.3E+10 |
| <b>12</b> | 280.00 | 6.7E+69 | 4.9E+09 | 4.9E+09 |
|           | 290.00 | 4.9E+67 | 6.7E+09 | 6.7E+09 |
|           | 298.15 | 1.2E+66 | 8.4E+09 | 8.3E+09 |
|           | 300.00 | 5.1E+65 | 8.8E+09 | 8.8E+09 |
|           | 310.00 | 7.1E+63 | 1.1E+10 | 1.1E+10 |
|           | 320.00 | 1.3E+62 | 1.4E+10 | 1.4E+10 |
|           | 330.00 | 3.0E+60 | 1.7E+10 | 1.7E+10 |
|           | 340.00 | 8.5E+58 | 2.0E+10 | 2.0E+10 |
|           | 350.00 | 3.0E+57 | 2.4E+10 | 2.4E+10 |
| <b>13</b> | 280.00 | 6.7E+69 | 4.9E+09 | 4.9E+09 |
|           | 290.00 | 4.9E+67 | 6.7E+09 | 6.7E+09 |
|           | 298.15 | 1.2E+66 | 8.4E+09 | 8.4E+09 |
|           | 300.00 | 5.1E+65 | 8.8E+09 | 8.8E+09 |
|           | 310.00 | 7.1E+63 | 1.1E+10 | 1.1E+10 |
|           | 320.00 | 1.3E+62 | 1.4E+10 | 1.4E+10 |
|           | 330.00 | 3.0E+60 | 1.7E+10 | 1.7E+10 |
|           | 340.00 | 8.5E+58 | 2.0E+10 | 2.0E+10 |
|           | 350.00 | 3.0E+57 | 2.4E+10 | 2.4E+10 |
| <b>14</b> | 280.00 | 6.7E+69 | 4.9E+09 | 4.9E+09 |
|           | 290.00 | 4.9E+67 | 6.7E+09 | 6.7E+09 |
|           | 298.15 | 1.2E+66 | 8.4E+09 | 8.4E+09 |
|           | 300.00 | 5.1E+65 | 8.8E+09 | 8.8E+09 |
|           | 310.00 | 7.1E+63 | 1.1E+10 | 1.1E+10 |
|           | 320.00 | 1.3E+62 | 1.4E+10 | 1.4E+10 |
|           | 330.00 | 3.0E+60 | 1.7E+10 | 1.7E+10 |
|           | 340.00 | 8.5E+58 | 2.0E+10 | 2.0E+10 |
|           | 350.00 | 3.0E+57 | 2.4E+10 | 2.4E+10 |

**Fig S1.** Intrinsic reaction coordinate (IRC) profiles connecting the pre-reactive complexes and the first transition states along all reaction pathways.

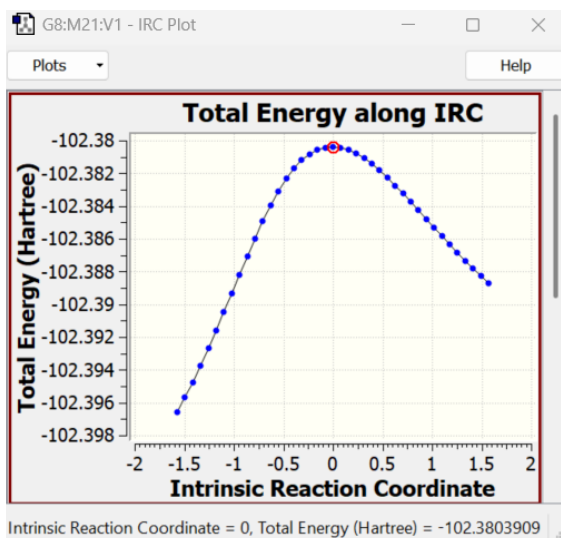

**IRC-TS1-G**

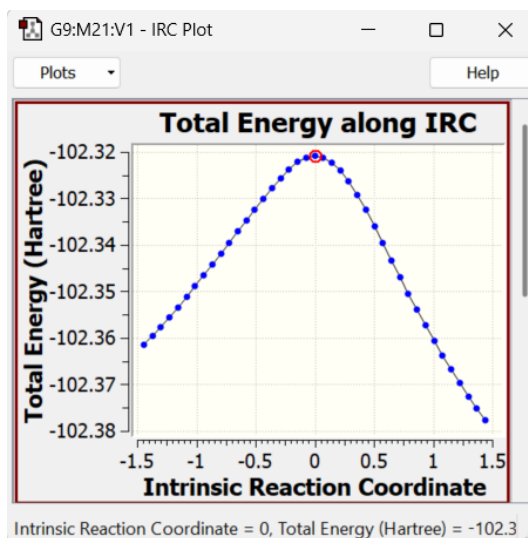

**IRC-TS2-G**

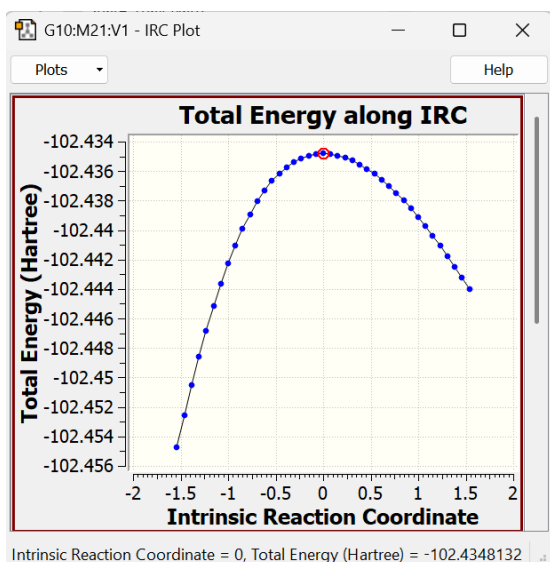

**IRC-TS3-G**

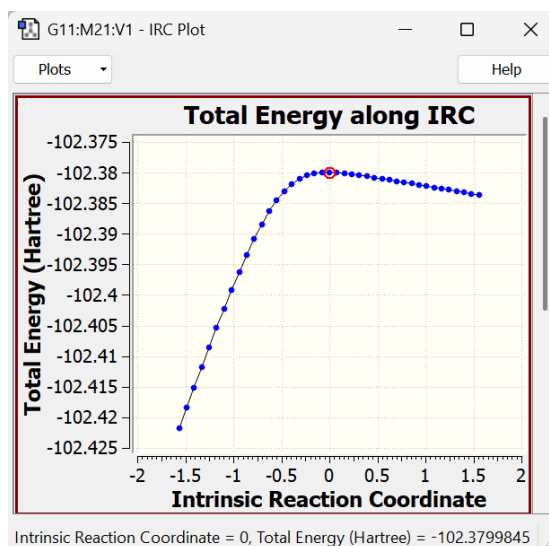

**IRC-TS4-G**

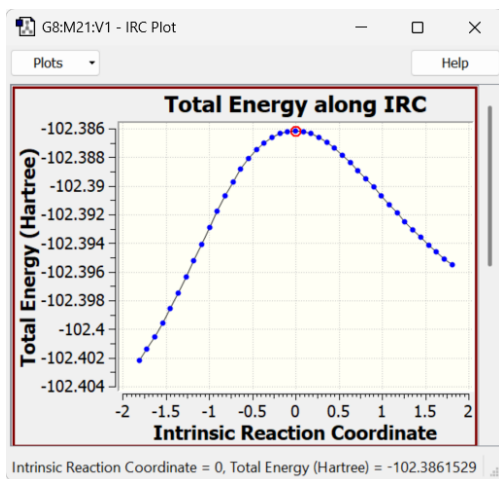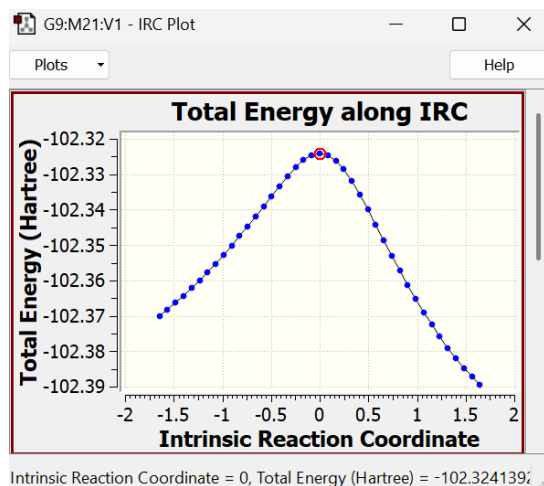

## TS1-W

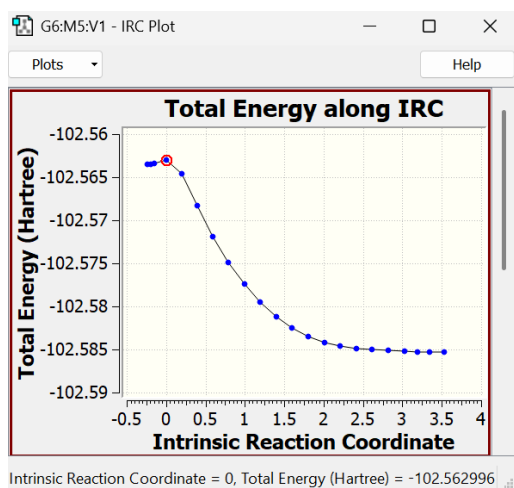

## TS2-W

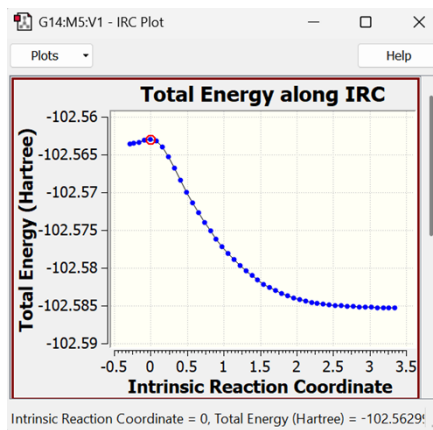

## IRC-TS3-W

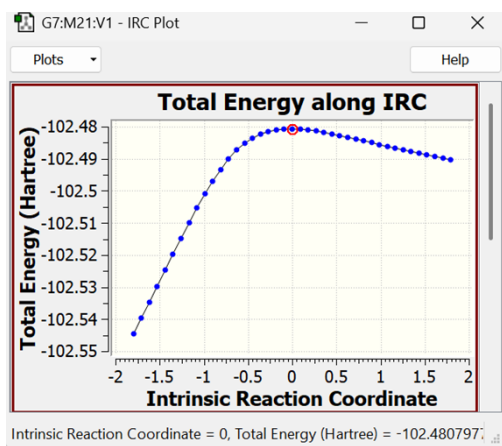

## IRC-TS3a-W

## IRC-TS4-W

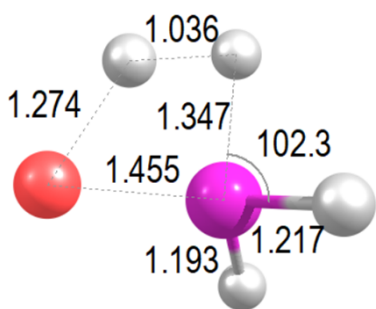

**TS2-G**

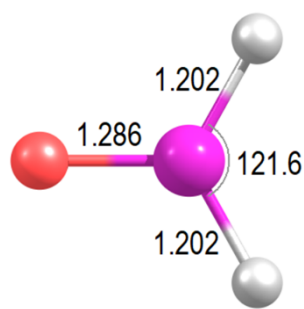

**BH<sub>2</sub>O<sup>+</sup>-G**

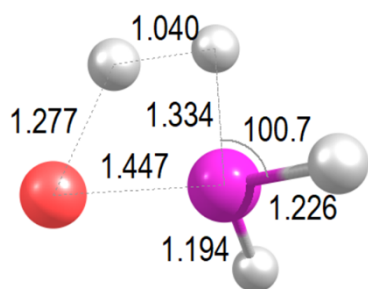

**TS2-W**

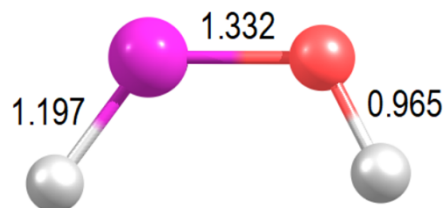

**OHBH<sup>+</sup>-G**

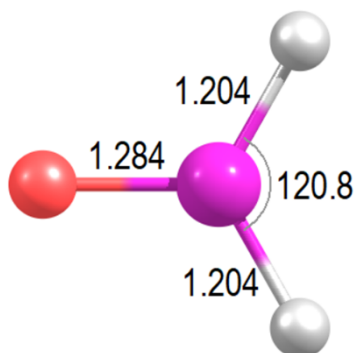

**BH<sub>2</sub>O<sup>+</sup>-W**

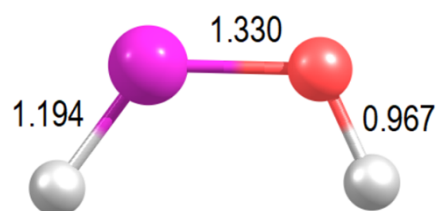

**OHBH<sup>+</sup>-W**

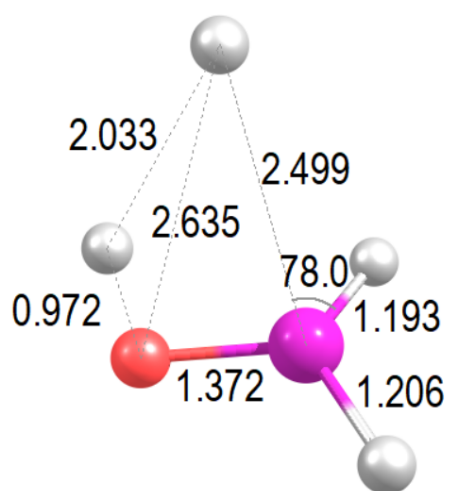

**TS3-G**

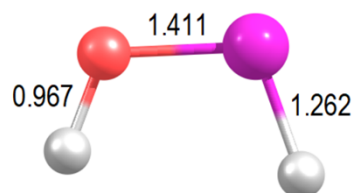

**OH-BH<sup>+</sup>-G**

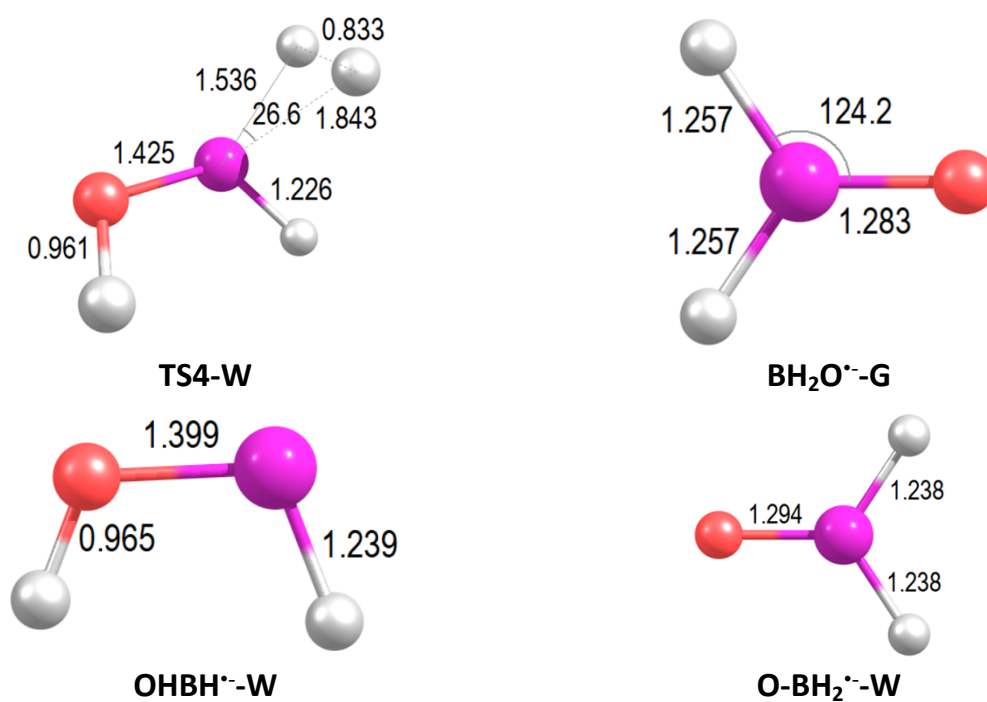

**Fig. S2** Optimized geometries of stationary points for the  $\text{BH}_3 + \text{HO}^\bullet$  and  $\text{BH}_3^- + \text{HO}^\bullet$  reaction in the gas phase and aqueous solution (PCM) at the M06-2X/6-311++G(d,p) level. Selected bond lengths (Å) and bond angles (°) are indicated. Gas-phase structures are labeled with the suffix “G”, whereas those in aqueous solution are denoted by “W”.
